# Supplementary material for: Adaptive Vaccination Strategies to Mitigate Pandemic Influenza: Mexico as a Case Study
Source: PubMed Central journal article supplement (PMC2781783; doi:10.1371/journal.pone.0008164), 2009-12-03
Supplement: pone.0008164.s009.pdf [file pone.0008164.s009.pdf]

**Table S1:** Normalized age-specific contact rates  $c_{i,j}$  per week as estimated from self-reported data for a typical week, after correction for reciprocity, Utrecht, the Netherlands, 1986 [27].

| Age class<br>(years) of<br>contacts | Age class (years) of participant |        |        |       |       |           |
|-------------------------------------|----------------------------------|--------|--------|-------|-------|-----------|
|                                     | 0-5                              | 6-12   | 13-19  | 20-39 | 40-59 | $\geq 60$ |
| 0-5                                 | 169.14                           | 31.47  | 17.76  | 34.50 | 15.83 | 11.47     |
| 6-12                                | 31.47                            | 274.51 | 32.31  | 34.86 | 20.61 | 11.50     |
| 13-19                               | 17.76                            | 32.31  | 224.25 | 50.75 | 37.52 | 14.96     |
| 20-39                               | 34.50                            | 34.86  | 50.75  | 75.66 | 49.45 | 25.08     |
| 40-59                               | 15.83                            | 20.61  | 37.52  | 49.45 | 61.26 | 32.99     |
| $\geq 60$                           | 11.47                            | 11.50  | 14.96  | 25.08 | 32.99 | 54.23     |
