# Supplementary material for: Adaptive Vaccination Strategies to Mitigate Pandemic Influenza: Mexico as a Case Study
Source: PubMed Central journal article supplement (PMC2781783; doi:10.1371/journal.pone.0008164), 2009-12-03
Supplement: pone.0008164.s010.pdf [file pone.0008164.s010.pdf]

# Supplementary information

G. Chowell<sup>1,2</sup>, C. Viboud<sup>2</sup>, X. Wang<sup>1</sup>, S.M. Bertozzi<sup>3,4</sup>, M. A. Miller<sup>2</sup>

<sup>1</sup> Mathematical, Computational & Modeling Sciences Center,

School of Human Evolution and Social Change, Arizona State University

Tempe, AZ 85282, USA

<sup>2</sup> Fogarty International Center, National Institutes of Health,

16 Center Drive, Bethesda, MD, 20892, USA

<sup>3</sup> National Institute of Public Health,

Center for Evaluation Research and Surveys, Cuernavaca, Mexico

<sup>4</sup> University of California, Berkeley, USA

## 1 Derivation of the basic reproduction number

From our age-structured model given in the main text, the expression for  $R_0$  can be derived using the next-generation operator method (1; 2). That is,  $R_0 = r(FW^{-1})$ , i.e.,  $R_0$  is the spectral radius of the next generation matrix  $FW^{-1}$ . In our model,

$$F = \begin{pmatrix} 0_{6 \times 6} & B & B \\ 0_{12 \times 6} & 0_{12 \times 6} & 0_{12 \times 6} \end{pmatrix},$$

with

$$B(i, j) = \beta_{ij} \xi_i \quad \text{where } \xi_i = \frac{N_i}{N} \quad \text{for } i, j = 1, \dots, 6,$$

and

$$W = \begin{pmatrix} kI_{6 \times 6} & 0_{6 \times 6} & 0_{6 \times 6} \\ -kI_{6 \times 6} & W_1 & 0_{6 \times 6} \\ 0_{6 \times 6} & W_2 & W_3 \end{pmatrix},$$

where for  $i, j = 1, \dots, 6$ ,  $j \neq i$ ,

$$W_1(i, i) = \alpha_i + \gamma_1, \quad W_1(i, j) = 0,$$

$$W_2(i, i) = -\alpha_i, \quad W_2(i, j) = 0,$$

$$W_3(i, i) = \gamma_2 + \delta_i, \quad W_3(i, j) = 0.$$

Therefore the next generation matrix is given by

$$FW^{-1} = \left( M_{ij} \right)_{i,j=1,\dots,6}$$

with

$$M_{ij} = \beta_{ij} \xi_i \left[ \left( \frac{1}{\alpha_j + \gamma_1} \right) \left( 1 + \frac{\alpha_j}{\gamma_2 + \delta_j} \right) \right], \quad i, j = 1, \dots, 6.$$

It is important to note that  $R_0$  depends on the age distribution of the initial susceptible population

$\xi_k = \frac{N_k}{N}$  where  $\sum_{k=1}^6 \xi_k = 1$ .

## References

- [1] Diekmann O, Heesterbeek J. Mathematical Epidemiology of Infectious Diseases: Model Building, Analysis and Interpretation. Wiley, New York; 2000.
- [2] van den Driessche P, Watmough J. Reproduction numbers and sub-threshold endemic equilibria for compartmental models of disease transmission. Math. Biosci. 2002;180:29-48.
